# Supplementary material for: Carbon-supported Mo2C electrocatalysts for hydrogen evolution reaction
Source: Royal Society of Chemistry journal article supplement (doi:10.1039/c5ta02346g), 2015-01-01
Supplement: c5ta02346g1.pdf [file c5ta02346g1.pdf]

### Electronic Supplementary Information

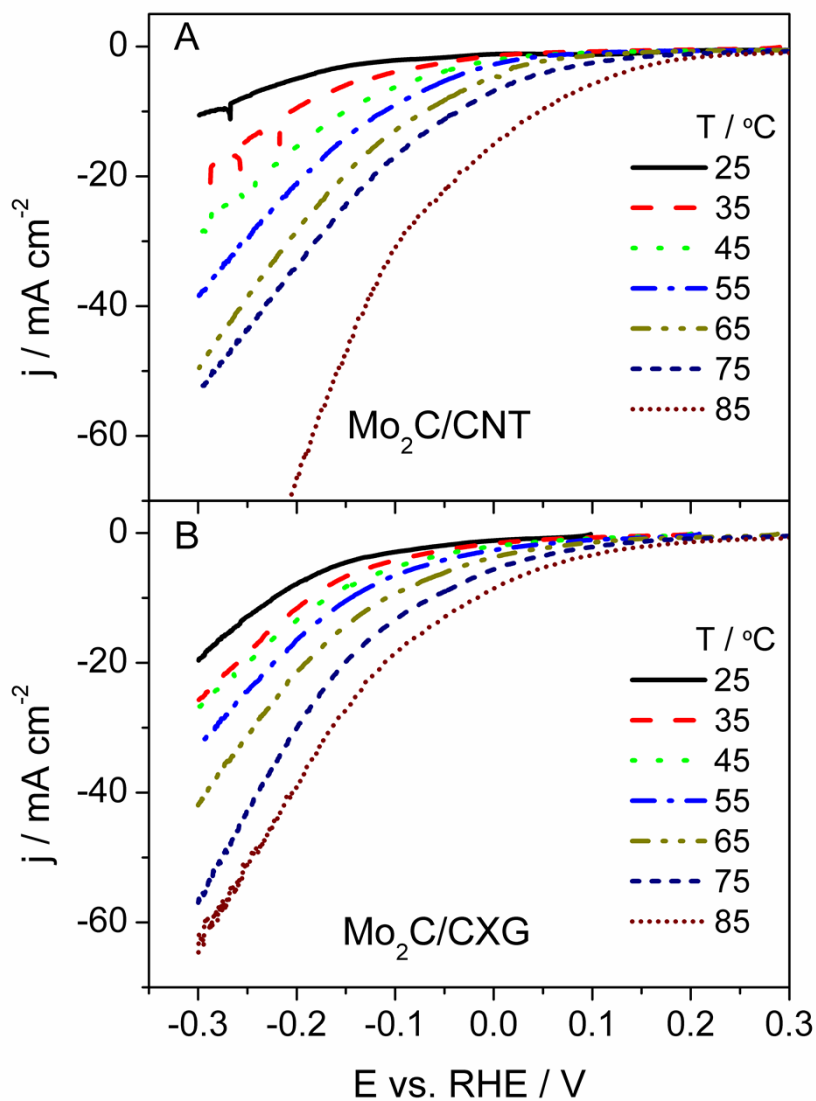

**Figure ESI-1.** Polarisation curves of  $\text{Mo}_2\text{C/CNT}$  (A) and  $\text{Mo}_2\text{C/CXG}$  (B) in 0.1 M  $\text{HClO}_4$  in the 25–85 °C range.

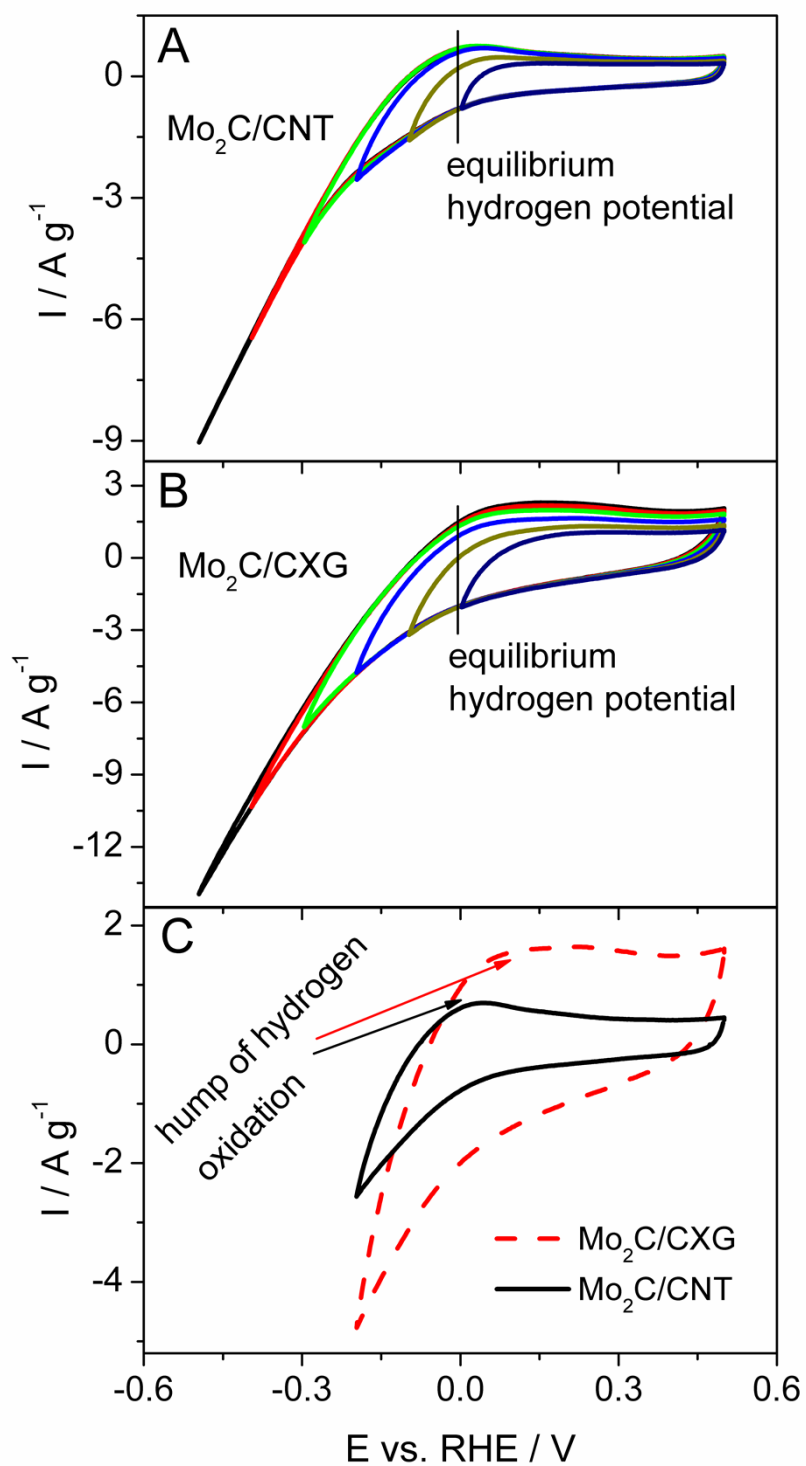

**Figure ESI-2.** The cyclic voltammograms of Mo<sub>2</sub>C/CNT (A) and Mo<sub>2</sub>C/CXG (B) recorded in 0.1 M HClO<sub>4</sub> with scan rate of 20 mV s<sup>-1</sup> with different cut-off potentials.
